# Supplementary material for: Common virulence gene expression in adult first-time infected malaria patients and severe cases
Source: eLife journal article supplement (doi:10.7554/elife.69040), 2021-04-28

A

BASE EXCISION REPAIR

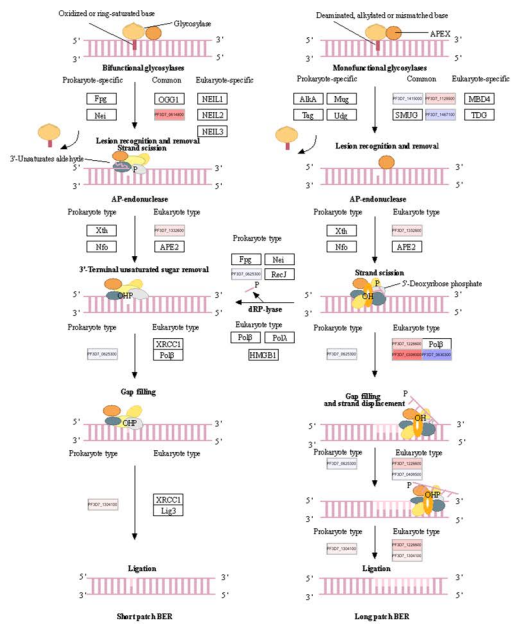

0340 T0167  
(c) Karylan Laboratories

B

| GeneID        | logFC  | adj.P.Val | KEGG abbreviation | Product Description                                  |
|---------------|--------|-----------|-------------------|------------------------------------------------------|
| PF3D7_1361900 | 1,144  | 0,00723   | PCNA              | proliferating cell nuclear antigen 1                 |
| PF3D7_0614800 | 1,338  | 0,00634   | NTH               | endonuclease III homologue, putative                 |
| PF3D7_0308000 | 1,617  | 0,00384   | Pold              | DNA polymerase delta small subunit, putative         |
| PF3D7_1415000 | 0,11   | 0,846     | UNG               | uracil-DNA glycosylase                               |
| PF3D7_1129500 | 0,641  | 0,0121    | MUTY              | A/G-specific adenine glycosylase, putative           |
| PF3D7_1467100 | -0,201 | 0,359     | MPG               | DNA-3-methyladenine glycosylase, putative            |
| PF3D7_1332600 | 0,538  | 0,0336    | APE1/APEX         | apurinic/aprimidinic endonuclease Ape1, putative     |
| PF3D7_0625300 | 0,128  | 0,731     | Dpol              | DNA polymerase 1, putative                           |
| PF3D7_1411400 | 0,243  | 0,503     | Dpol              | plastid replication-repair enzyme                    |
| PF3D7_1226600 | 0,724  | 0,0708    | PCNA              | proliferating cell nuclear antigen 2                 |
| PF3D7_1017000 | 0,961  | 0,0285    | Pold              | DNA polymerase delta catalytic subunit               |
| PF3D7_0630300 | -0,761 | 0,185     | Pole              | DNA polymerase epsilon catalytic subunit A, putative |
| PF3D7_1234300 | 0,29   | 0,298     | Pole              | DNA polymerase epsilon subunit B, putative           |
| PF3D7_1304100 | 0,411  | 0,526     | Lig1              | DNA ligase I                                         |
| PF3D7_0408500 | 0,152  | 0,723     | Fen1              | flap endonuclease 1                                  |

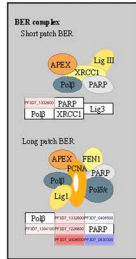

Supplement: supp [file elife-69040-supp-v1.zip]
