# Supplementary figures and images for: Common virulence gene expression in adult first-time infected malaria patients and severe cases
Source: eLife journal article supplement (doi:10.7554/elife.69040), 2021-04-28

A

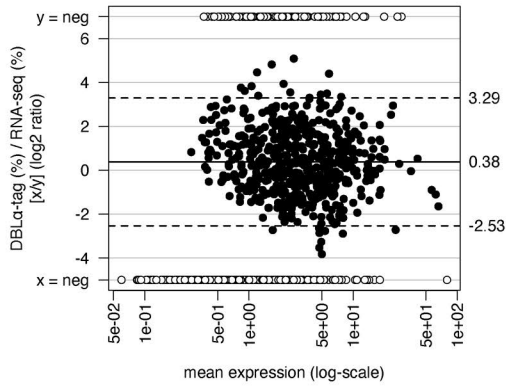

B

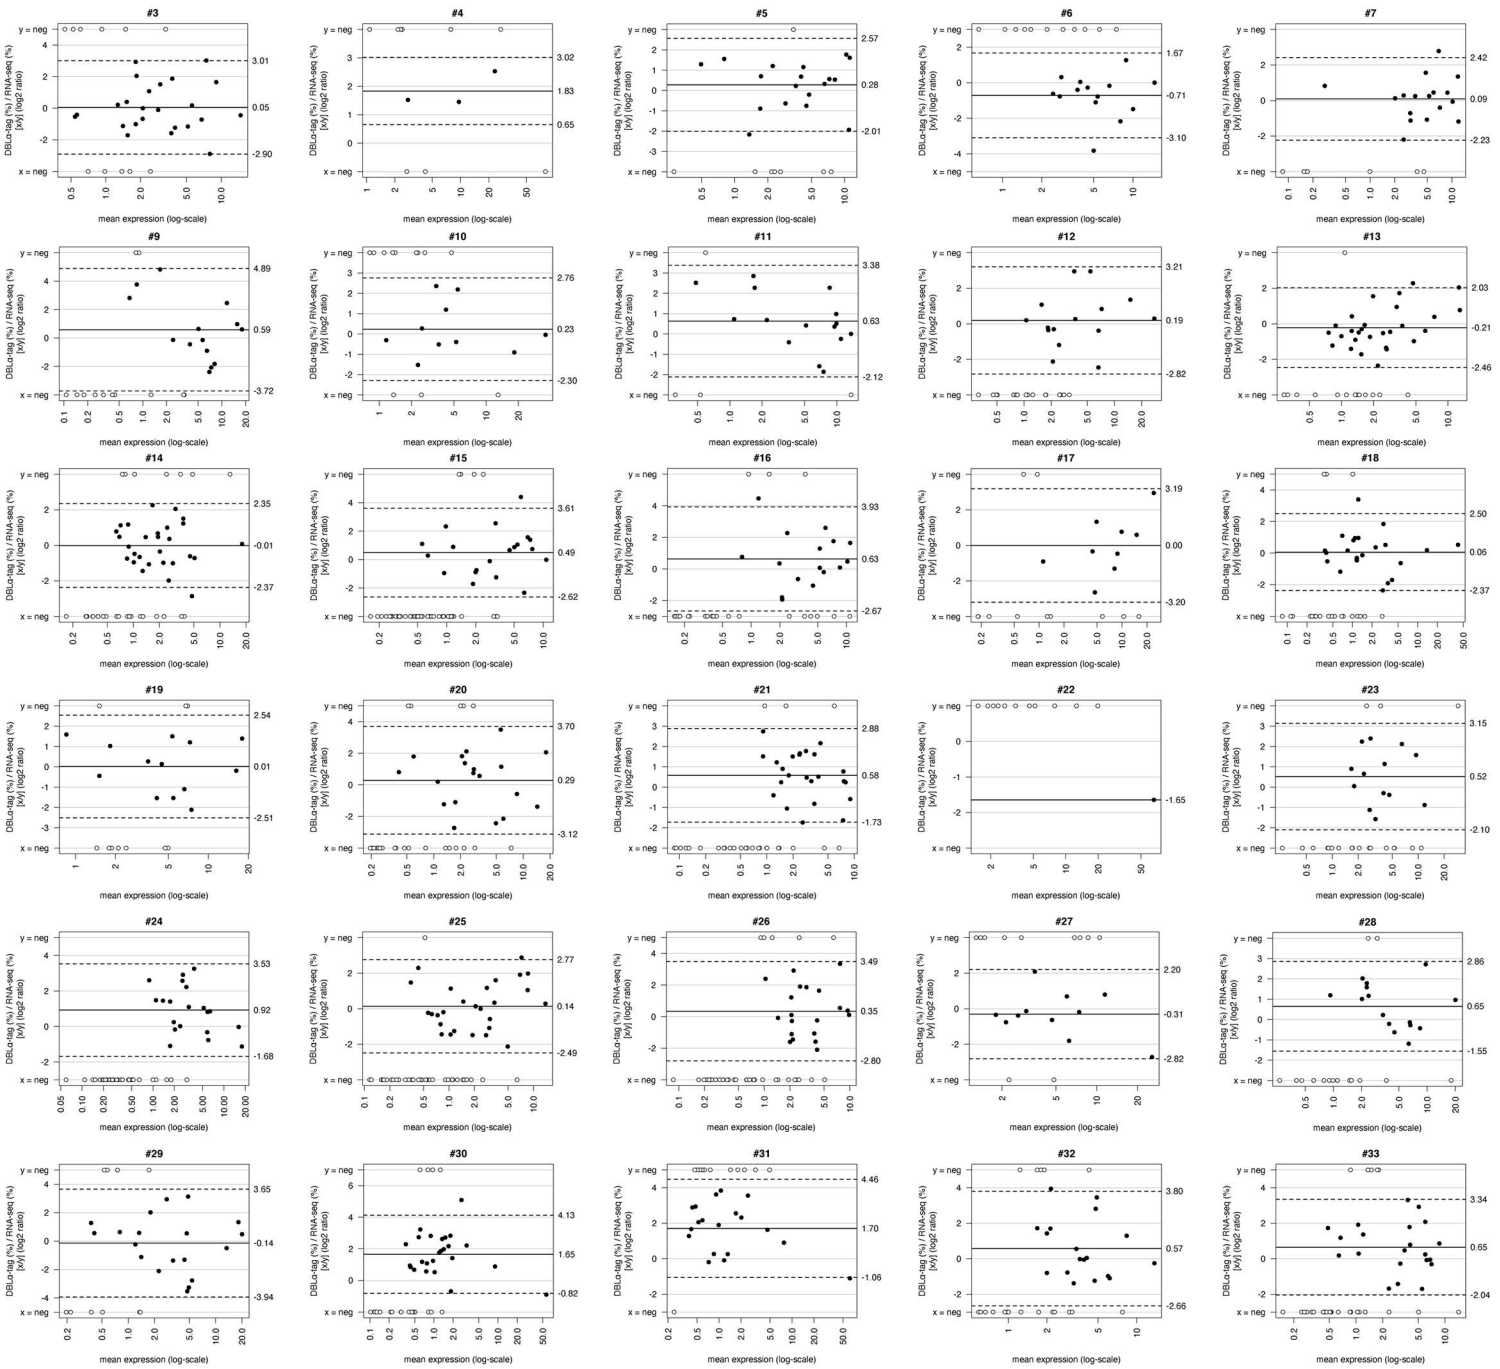

Supplement: supp [file elife-69040-supp-v1.zip]

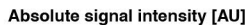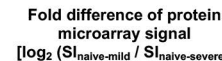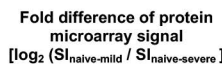

Supplement: supp [file elife-69040-supp-v1.zip]

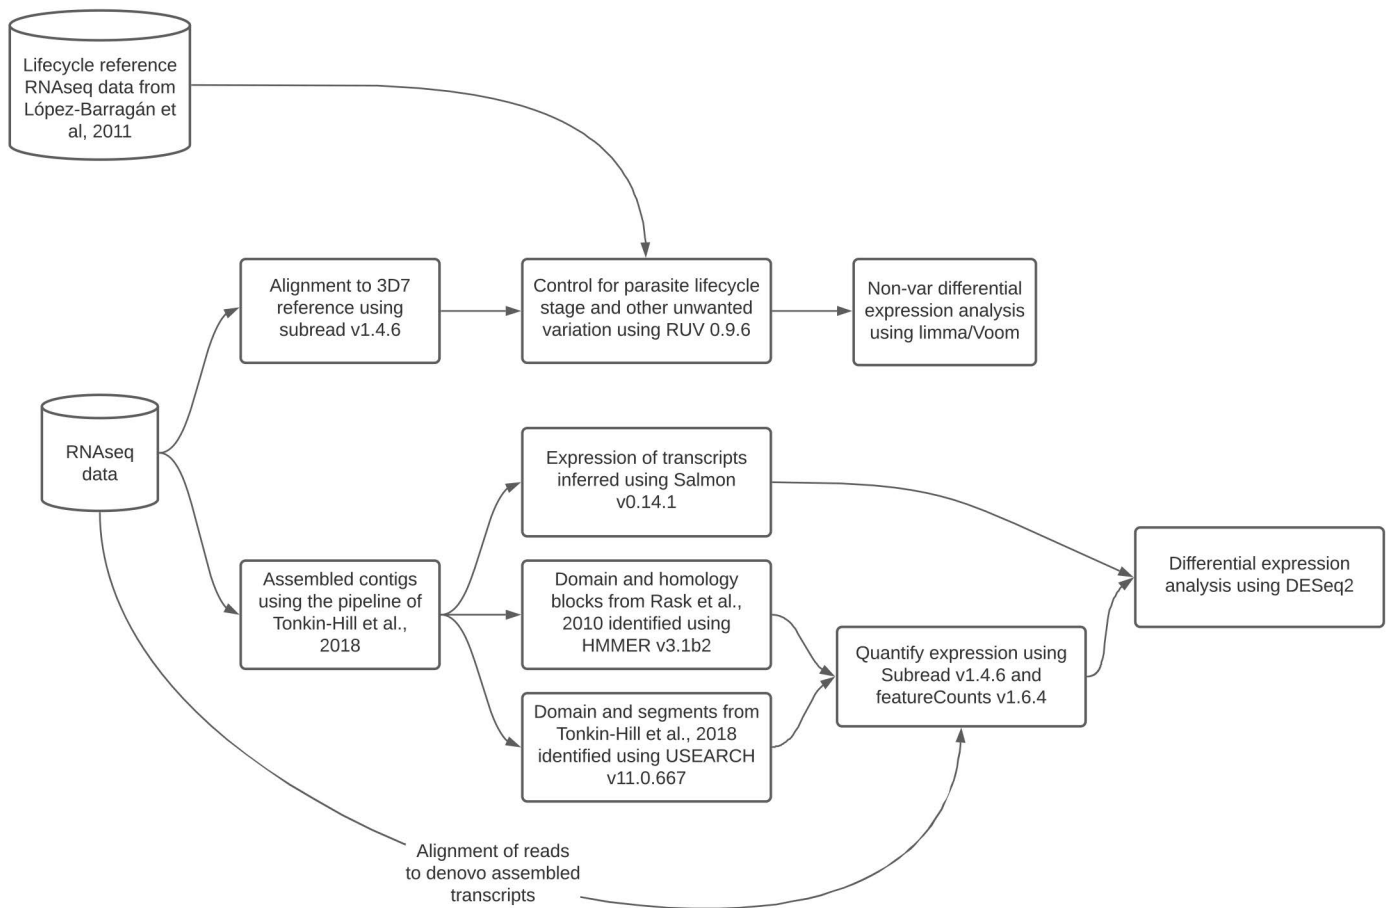

Supplement: supp [file elife-69040-supp-v1.zip]

A

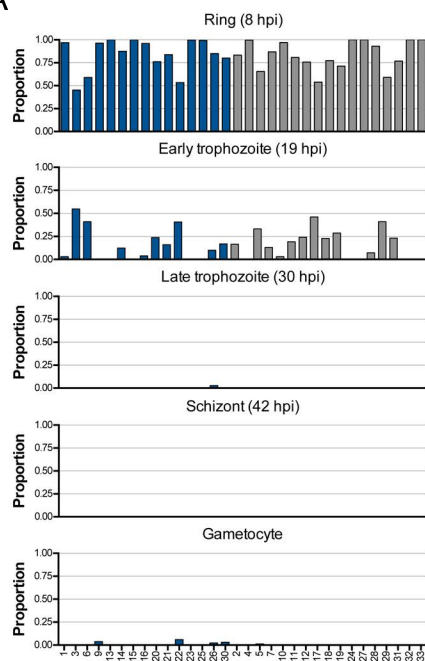

B

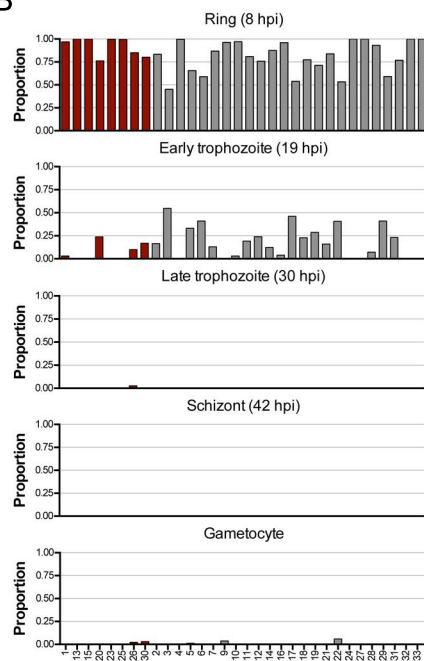

C

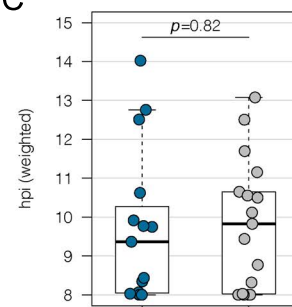

D

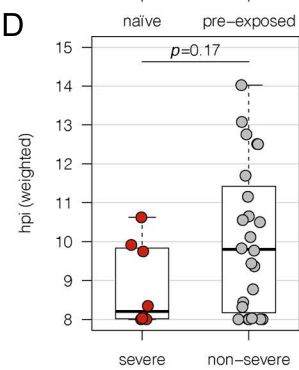

Supplement: supp [file elife-69040-supp-v1.zip]

A

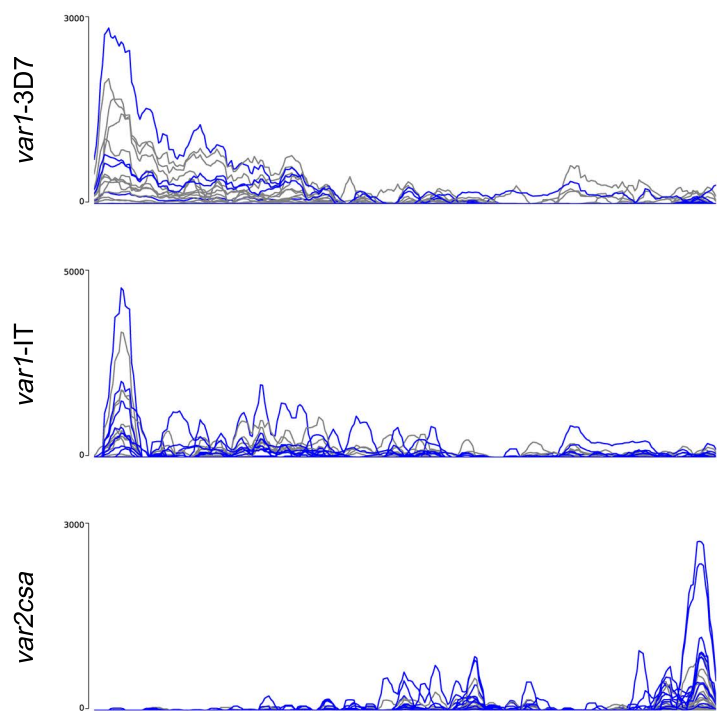

B

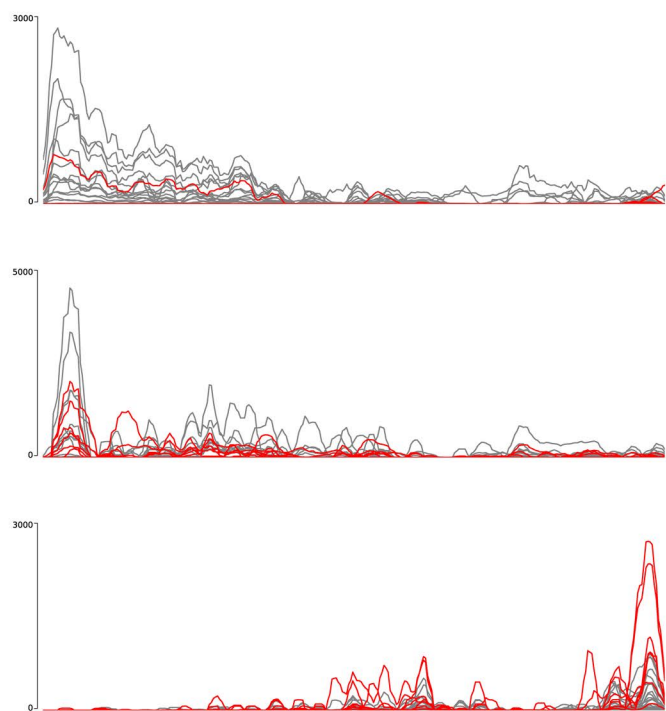

Supplement: supp [file elife-69040-supp-v1.zip]

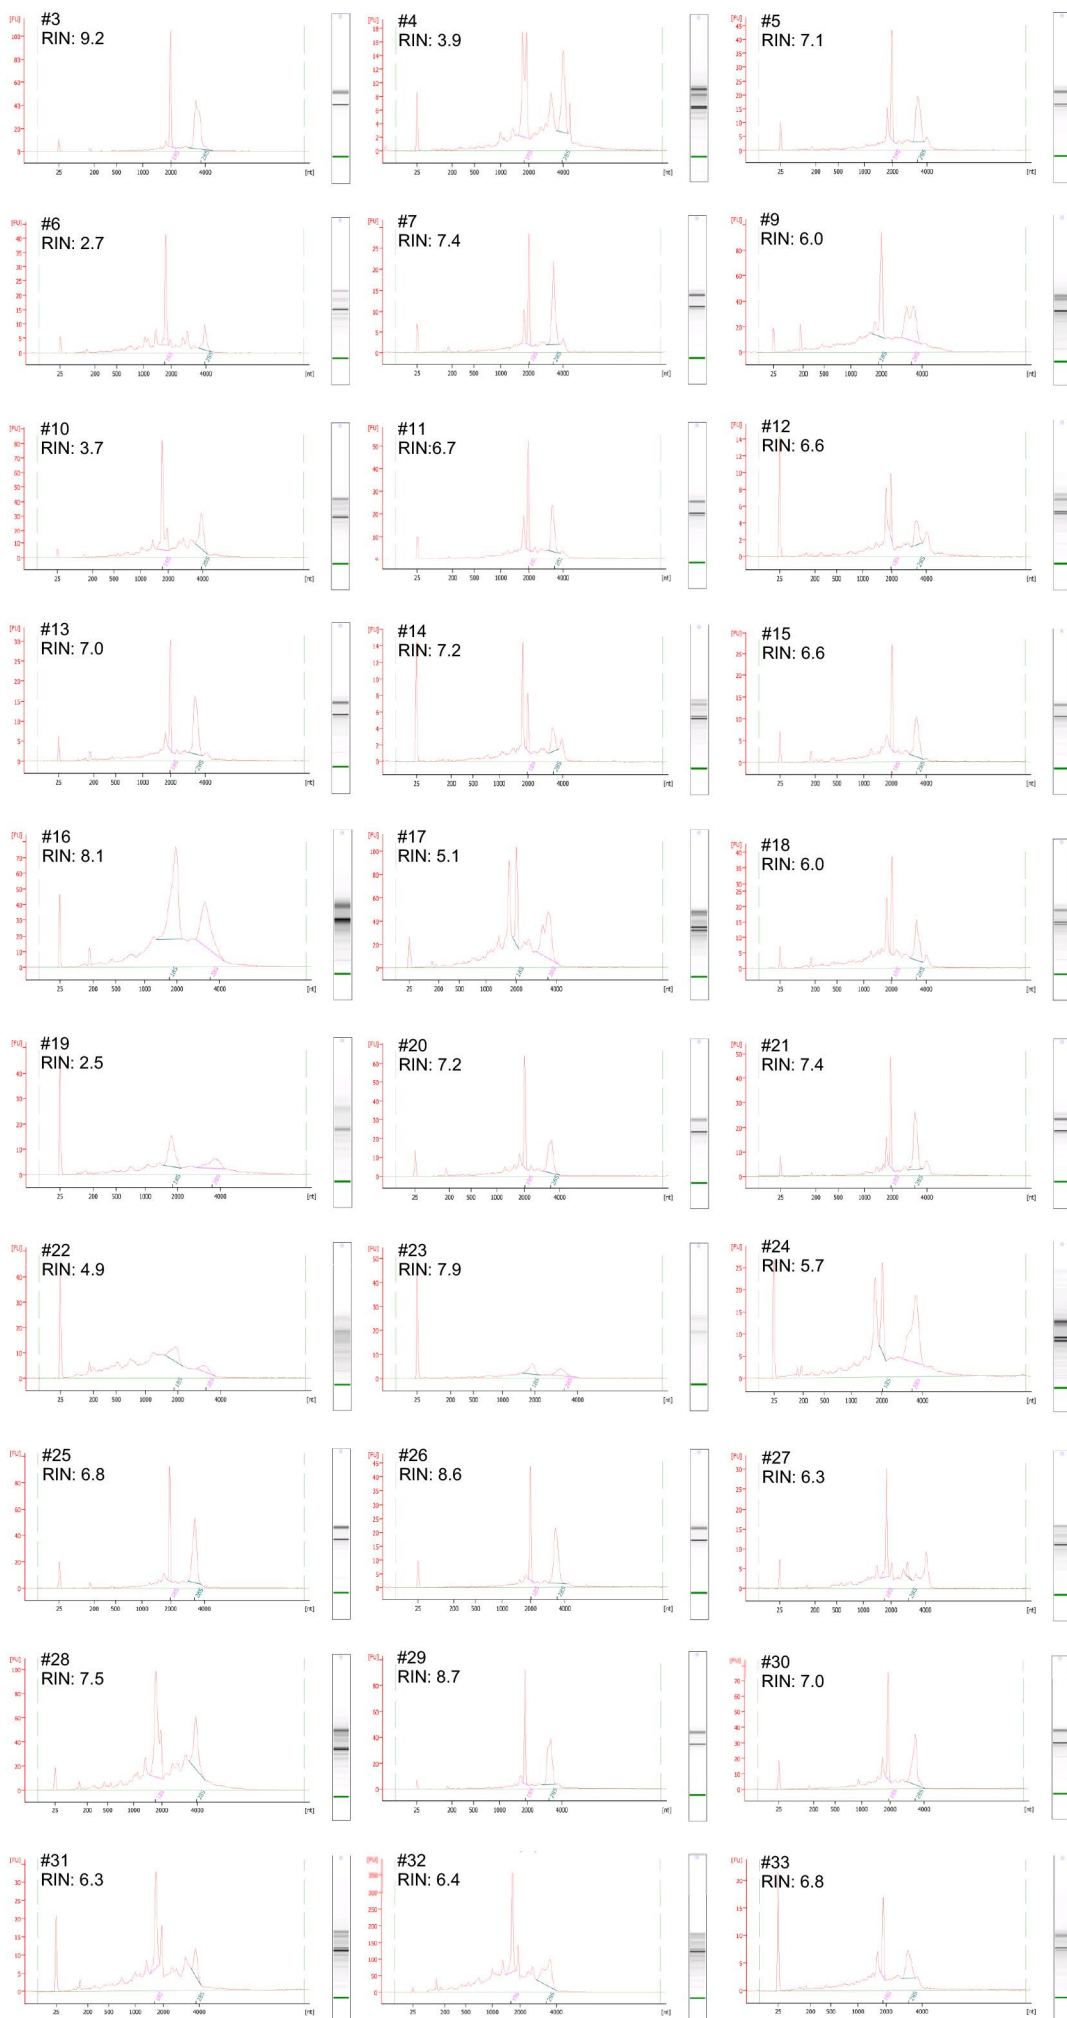

Supplement: supp [file elife-69040-supp-v1.zip]

A

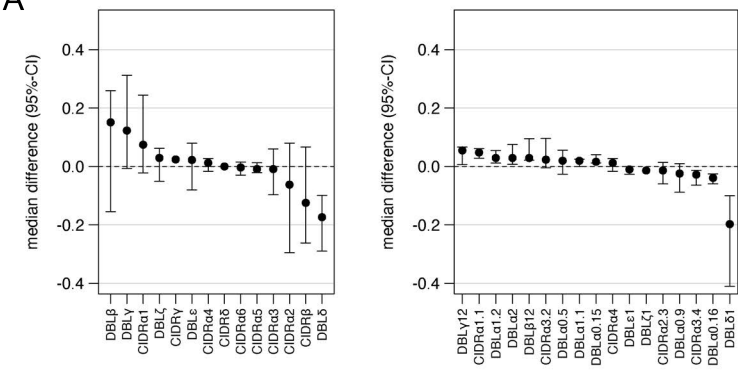

B

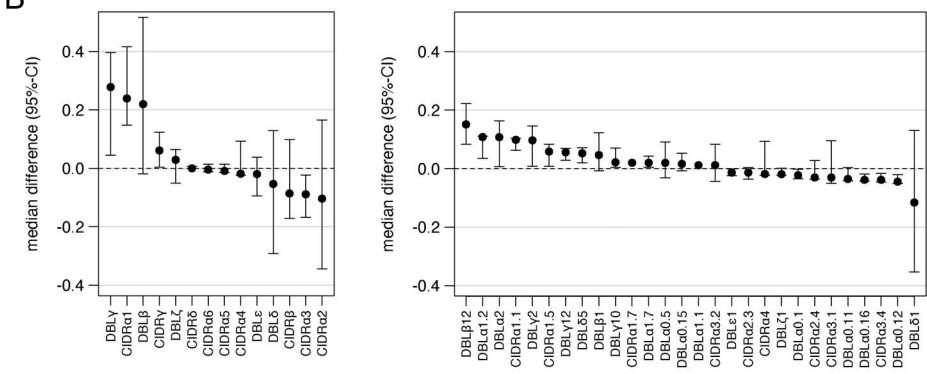

Supplement: supp [file elife-69040-supp-v1.zip]
